# Supplementary material for: Unveiling light effect on formation of trisulfur radicals in lithium–sulfur batteries
Source: Royal Society of Chemistry journal article supplement (doi:10.1039/d3cc00120b), 2023-01-01
Supplement: d3cc00120b1.pdf [file d3cc00120b1.pdf]

Electronic Supplementary Information

**Unveiling Light Effect on Formation of Trisulfur Radicals in Lithium–Sulfur Batteries**

Bohai Zhang,<sup>a, b</sup> Zhenyu Wang,<sup>c</sup> Huifu Ji,<sup>a</sup> Hao Zhang,<sup>a</sup> Lanlan Li,<sup>a</sup> Jiandong Hu,<sup>a</sup> Shixin Li,<sup>a</sup> and Junfeng Wu\*,<sup>a</sup>

<sup>a</sup> *Henan International Joint Laboratory of Laser Technology in Agriculture Sciences, College of Mechanical & Electrical Engineering, Henan Agricultural University, Zhengzhou 450002, Henan, China.*

<sup>b</sup> *Institute of New Energy Material Chemistry, School of Materials Science and Engineering, Nankai University, Tianjin 300350, China.*

<sup>c</sup> *Institute of Science and Technology, China Three Gorges Corporation, Beijing 101100, China.*

\*Corresponding author. E-mail: [jfwu@henau.edu.cn](mailto:jfwu@henau.edu.cn)

## S1 Experimental and calculation

### S1.1 Preparation of the $\text{Li}_2\text{S}_6$ solution and the electrolyte with $\text{Li}_2\text{S}_6$

$\text{Li}_2\text{S}_6$  solution was prepared by mixing  $\text{Li}_2\text{S}$  and S with a stoichiometric ratio of 1:5 into DMSO solvent, *i.e.*,  $\text{Li}_2\text{S} + 5\text{S} = \text{Li}_2\text{S}_6$ . The prepared solution was then diluted to the concentration of interest. The electrolyte used in this work was prepared by dissolving 1.0 M lithium bis(trifluoromethanesulfonyl)imide (LiTFSI) in DMSO, which was set as the blank electrolyte. The electrolyte which contains  $\text{Li}_2\text{S}_6$  was prepared by diluting  $\text{Li}_2\text{S}_6$  solution in the blank electrolyte.

### S1.2 Spectroscopic characterization

Raman spectroscopy was measured on a Raman spectrometer (SR-500I-A) with a 532 nm laser. UV-vis spectra were measured on a UV-vis spectrophotometer (CARY 100 Cone), with deuterium (200 – 350 nm) and tungsten (350 – 800 nm) lamps as the light source. All ESR measurements were tested on an ESR spectrometer (MS400) under dark conditions, with a microwave frequency of  $\sim 9.3$  GHz at the power of 20 mW power. The sweeping rate was set at 7.19 GHz/s. SEM images were performed using a field emission scanning electron microscope (JSM-7800) with an elemental mapping apparatus.

### S1.3 Electrochemical Measurements

The graphene/sulfur (G/S) composite was synthesized through the melting method. In this method, graphene and sulfur were mixed at 1:3 ratio and heated to 155 °C. The sulfur cathode consists of an 80 wt% of G/S composite, 10 wt% of Super-P conductive carbon, and 10 wt% of PVDF binder. The areal sulfur loading of cathodes is ca. 1.0 mg  $\text{cm}^{-2}$  and E/S = 10  $\mu\text{L mg}^{-1}$ . Li-S cells were assembled in an Ar-filled glovebox using Celgard 2300 separator and Li metal anode. Galvanostatic discharge and charge tests were performed at 0.1 C (1 C = 1675 mA  $\text{g}^{-1}$ ) on a LAND battery test system (CT2001C) within the potential range of 1.7 – 2.8 V (*vs.* Li/Li<sup>+</sup>). Electrochemical impedance spectra (EIS) were performed on an electrochemical workstation (ZAHNER elektrik IM6ex) from 100 kHz to 10 mHz, with an amplitude of 5 mV. The specific capacity of Li-S cells was calculated based on the mass of total sulfur, including sulfur of  $\text{Li}_2\text{S}_6$ .

### S1.4 *Ab initio* calculations

The geometrical optimizations of Li<sup>+</sup>-DMSO and polysulfide-DMSO clusters were calculated by *ab initio* calculations in the gas phase. The density functional was selected as M06-2X,<sup>1</sup> with the basis set of 6-31+G(d). The D3 dispersion correction was selected to present the weak interaction in the clusters. The optimized configurations were subjected to frequency calculations to ensure that they were at a local minimum of the potential energy surface. The Gibbs free energy correction at  $P^\circ = 1$  atm and  $T = 298.15$  K was obtained by canonical

ensemble partition function. The cluster-continuum solvation model<sup>2</sup> was utilized to obtain  $\Delta G^*(X)$ , where ( $X = \text{Li}^+, \text{Li}_2\text{S}_6, \text{LiS}_6^-, \text{S}_6^{2-}, \text{LiS}_4^{\bullet}, \text{LiS}_3^{\bullet}, \text{LiS}_2^{\bullet}, \text{S}_4^{\bullet-}, \text{S}_3^{\bullet-}, \text{and } \text{S}_2^{\bullet-}$ ). The solvation Gibbs free energies of  $\text{Li}^+$ -DMSO and polysulfide-DMSO clusters were calculated by SMD solvation model.<sup>3</sup>

The calculated Raman spectra were obtained at M06-2X/6-31+G(d)<sup>1</sup> level of theory with the SMD solvation model.<sup>3</sup> The calculated UV-vis spectra were obtained by TD-DFT<sup>4</sup> calculations at M06-2X/6-311+G(2d,p) level of theory with the SMD solvation model, based on the benchmark study by Truhlar *et al.*<sup>5</sup>

Vertical electron affinity (VEA) and nucleophilicity index (NI) of X species ( $X = \text{Li}_2\text{S}_6, \text{LiS}_6^-, \text{S}_6^{2-}, \text{LiS}_3^{\bullet}, \text{and } \text{S}_3^{\bullet-}$ ) were calculated by M06-2X/6-31+G(d) level of theory with SMD solvation model.  $\text{VEA}(X) = E_N(X) - E_{N+1}(X)$ , in which E is the electronic energy, and N and N+1 are the electron states.  $\text{NI} = E_{\text{HOMO}}(X) - E_{\text{HOMO}}(\text{TCE})$ , in which TCE denotes the tetracyanoethylene molecules. The HOMO energy of tetracyanoethylene is almost the lowest among all organic molecules, and thus, it is commonly selected as a reference in NI calculation.<sup>6</sup> All the energy calculations mentioned above were calculated at M06-2X/6-31+G(d) level of theory, on Gaussian 16 program.<sup>7</sup>

## S2 Calculation of dissociation constant $\text{p}K_{\text{di}}$ ( $i = 1-10$ )

### S2.1 Dissociation Gibbs free energies $\Delta G_{\text{di}}^*$ ( $i = 1-10$ )

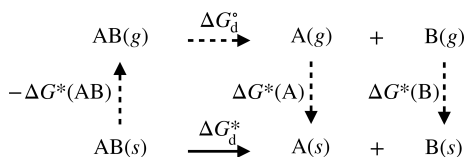

**Fig. S1.** The thermodynamic cycle used to calculate the  $\Delta G_{\text{di}}^*$  ( $i = 1-10$ ) of Rxns 1-10.  $\text{AB}(s)$  compounds can dissociate into  $\text{A}(s)$  and  $\text{B}(s)$  in the solution phase with dissociation Gibbs free energy of  $\Delta G_d^*$ . To obtain  $\Delta G_d^*$  for the dissociation of AB, we need to vaporize  $\text{AB}(s)$  into the gas phase (denoted as  $\text{AB}(g)$ ). The negative solvation Gibbs free energy in the gas phase is  $-\Delta G^*(\text{AB})$ .  $\text{AB}(g)$  may then dissociate into  $\text{A}(g)$  and  $\text{B}(g)$  in the gas phase with dissociation Gibbs free energy of  $\Delta G_d^\circ$ . Then  $\text{A}(g)$  and  $\text{B}(g)$  will be solvated into the solution with solvation Gibbs free energy of  $\Delta G^*(\text{A})$  and  $\Delta G^*(\text{B})$ , respectively. Finally, the calculation of Gibbs free energy of the dissociation reactions can be calculated using the following equation:  $\Delta G_d^* = \Delta G_d^\circ + \Delta G^*(\text{A}) + \Delta G^*(\text{B}) - \Delta G^*(\text{AB}) + 1.89$ , where 1.89 is the difference of free energy between the standard state in the solution phase and gas phase. The unit is in  $\text{kcal mol}^{-1}$ .

As mentioned in the main text, there are 10 potential dissociate routes for  $\text{Li}_2\text{S}_6$  in DMSO solution, which can be written as follows:

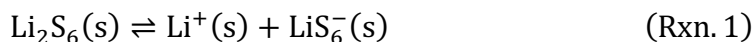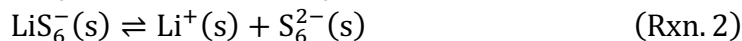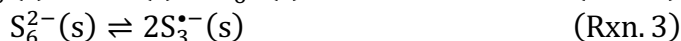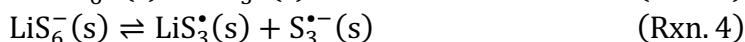

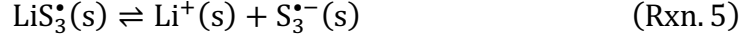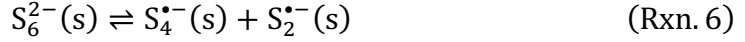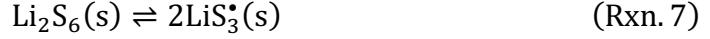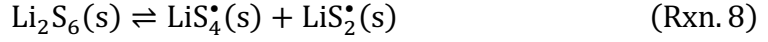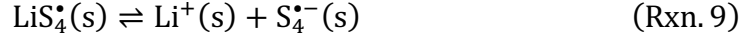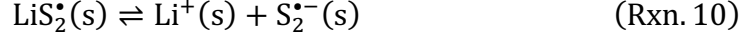

The Gibbs free energies for the dissociation reactions Rxns. 1-10 ( $\Delta G_{\text{di}}^*$ ,  $i = 1-10$ ) were calculated by design thermodynamic cycle (Fig. S1). The reactants AB(s) (AB =  $\text{Li}_2\text{S}_6$ ,  $\text{LiS}_6^-$ ,  $\text{S}_6^{2-}$ ,  $\text{LiS}_4^\bullet$ ,  $\text{LiS}_3^\bullet$ , and  $\text{LiS}_2^\bullet$ ) may dissociate into A(s) and B(s) (A =  $\text{Li}^+$ ,  $\text{LiS}_4^\bullet$ ,  $\text{LiS}_3^\bullet$ ,  $\text{S}_4^{\bullet-}$ , and  $\text{S}_3^{\bullet-}$ ; B =  $\text{LiS}_6^-$ ,  $\text{S}_6^{2-}$ ,  $\text{LiS}_3^\bullet$ ,  $\text{LiS}_2^\bullet$ ,  $\text{S}_4^{\bullet-}$ ,  $\text{S}_3^{\bullet-}$ , and  $\text{S}_2^{\bullet-}$ ) in DMSO, with dissociation Gibbs free energy of  $\Delta G_{\text{di}}^*$  ( $i = 1-10$ ). To obtain  $\Delta G_{\text{di}}^*$  above, firstly, the dissociation Gibbs free energy ( $\Delta G_{\text{di}}^\circ$ ) of Rxns 1-10 in the gas phase were directly calculated by *ab initio* calculations at M06-2X/6-31+G(d) level of theory<sup>1</sup>. Then, the negative solvation Gibbs free energy of AB(s) ( $-\Delta G^*(\text{AB})$ ), and the solvation Gibbs free energy of A(s) and B(s) ( $\Delta G^*(\text{A})$  and  $\Delta G^*(\text{B})$ ) were calculated by the cluster-continuum model<sup>2</sup> at M06-2X/6-31+G(d) level of theory<sup>1</sup>, where SMD solvation model<sup>3</sup> was also used. Finally, the  $\Delta G_{\text{di}}^* = \Delta G_{\text{di}}^\circ + \Delta G^*(\text{A}) + \Delta G^*(\text{B}) - \Delta G^*(\text{AB}) + 1.89$  was used to obtain the  $\Delta G_{\text{di}}^*$  where 1.89 is the difference of Gibbs free energy between the standard state of solution phase and gas phase. The unit is in kcal mol<sup>-1</sup>. Then the  $\Delta G_{\text{di}}^*$  of Rxns. 1-10 can be calculated by Eqs. S1-S10, *i.e.*,

$$\Delta G_{\text{d1}}^* = \Delta G_{\text{d1}}^\circ + \Delta G^*(\text{Li}^+) + \Delta G^*(\text{LiS}_6^-) - \Delta G^*(\text{Li}_2\text{S}_6) + 1.89 \quad (\text{S1})$$

$$\Delta G_{\text{d2}}^* = \Delta G_{\text{d2}}^\circ + \Delta G^*(\text{Li}^+) + \Delta G^*(\text{S}_6^{2-}) - \Delta G^*(\text{LiS}_6^-) + 1.89 \quad (\text{S2})$$

$$\Delta G_{\text{d3}}^* = \Delta G_{\text{d3}}^\circ + 2\Delta G^*(\text{S}_3^{\bullet-}) - \Delta G^*(\text{S}_6^{2-}) + 1.89 \quad (\text{S3})$$

$$\Delta G_{\text{d4}}^* = \Delta G_{\text{d4}}^\circ + \Delta G^*(\text{LiS}_3^\bullet) + \Delta G^*(\text{S}_3^{\bullet-}) - \Delta G^*(\text{LiS}_6^-) + 1.89 \quad (\text{S4})$$

$$\Delta G_{\text{d5}}^* = \Delta G_{\text{d5}}^\circ + \Delta G^*(\text{Li}^+) + \Delta G^*(\text{S}_3^{\bullet-}) - \Delta G^*(\text{LiS}_3^\bullet) + 1.89 \quad (\text{S5})$$

$$\Delta G_{\text{d6}}^* = \Delta G_{\text{d6}}^\circ + \Delta G^*(\text{S}_4^{\bullet-}) + \Delta G^*(\text{S}_2^{\bullet-}) - \Delta G^*(\text{S}_6^{2-}) + 1.89 \quad (\text{S6})$$

$$\Delta G_{\text{d7}}^* = \Delta G_{\text{d7}}^\circ + 2\Delta G^*(\text{LiS}_3^\bullet) - \Delta G^*(\text{Li}_2\text{S}_6) + 1.89 \quad (\text{S7})$$

$$\Delta G_{\text{d8}}^* = \Delta G_{\text{d8}}^\circ + \Delta G^*(\text{LiS}_4^\bullet) + \Delta G^*(\text{LiS}_2^\bullet) - \Delta G^*(\text{Li}_2\text{S}_6) + 1.89 \quad (\text{S8})$$

$$\Delta G_{\text{d9}}^* = \Delta G_{\text{d9}}^\circ + \Delta G^*(\text{Li}^+) + \Delta G^*(\text{S}_4^{\bullet-}) - \Delta G^*(\text{LiS}_4^\bullet) + 1.89 \quad (\text{S9})$$

$$\Delta G_{\text{d10}}^* = \Delta G_{\text{d10}}^\circ + \Delta G^*(\text{Li}^+) + \Delta G^*(\text{S}_2^{\bullet-}) - \Delta G^*(\text{LiS}_2^\bullet) + 1.89 \quad (\text{S10})$$

## S2.2 Thermodynamic cycle for the calculation of $\Delta G^*(\text{X})$ ( $\text{X} = \text{Li}^+$ , $\text{Li}_2\text{S}_6$ , $\text{LiS}_6^-$ , $\text{S}_6^{2-}$ , $\text{S}_4^{\bullet-}$ , $\text{S}_3^{\bullet-}$ , $\text{S}_2^{\bullet-}$ , $\text{LiS}_4^\bullet$ , $\text{LiS}_3^\bullet$ , and $\text{LiS}_2^\bullet$ ) by cluster-continuum solvation model

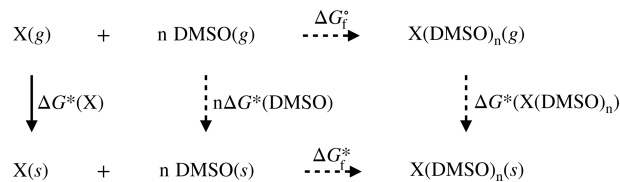

**Fig. S2.** Thermodynamic cycle for the calculation of solvation Gibbs free energy  $\Delta G^*(\text{X})$  ( $\text{X} = \text{Li}^+$ ,  $\text{Li}_2\text{S}_6$ ,  $\text{LiS}_6^-$ ,  $\text{S}_6^{2-}$ ,  $\text{S}_4^{\bullet-}$ ,  $\text{S}_3^{\bullet-}$ ,  $\text{S}_2^{\bullet-}$ ,  $\text{LiS}_4^\bullet$ ,  $\text{LiS}_3^\bullet$ , and  $\text{LiS}_2^\bullet$ ) by cluster-continuum solvation model. (s) and (g) denote the solution phase and the gas phase, respectively.

To obtain the  $\Delta G_{\text{di}}^*$  of Rxns. S1-S10 by Eqs. S1'-S10', the solvation Gibbs free energy  $\Delta G^*(X)$  ( $X = \text{Li}_2\text{S}_6, \text{LiS}_6^-, \text{S}_6^{2-}, \text{S}_4^-, \text{S}_3^-, \text{S}_2^-, \text{LiS}_4^+, \text{LiS}_3^+, \text{LiS}_2^+, \text{and Li}^+$ ) in DMSO solution is calculated by cluster-continuum solvation model. As shown in Fig. S2,  $\Delta G^*(X)$  in DMSO solution phase can be calculated by

$$\Delta G^*(X) = \Delta G_f^\circ + \Delta G^*(X(\text{DMSO})_n) - n\Delta G^*(\text{DMSO}) - \Delta G_f^* - 1.89n \quad (\text{S11})$$

in which  $\Delta G_f^\circ$  is the formation Gibbs free energy of  $X(\text{DMSO})_n$  cluster in the gas phase, followed by the solvation Gibbs free energy of  $X(\text{DMSO})_n$ , calculated by SMD solvation model.<sup>3</sup> The superscript \* refers to the standard state in the solution phase of concentration 1.0 M of DMSO or  $X(\text{DMSO})_n$  and temperature  $T = 298.15$  K, which can be converted to standard state ( $^\circ$ ) in the gas phase of  $P = 1$  atm and  $T = 298.15$  K by adding  $RT \ln \frac{RT}{P} = 1.89 \text{ kcal mol}^{-1}$ , in which  $R = 0.001987 \text{ kcal mol}^{-1} \text{ K}^{-1}$  is the ideal gas constant.  $\Delta G_f^*$  is the formation Gibbs free energy of  $X(\text{DMSO})_n$  cluster in the solution phase, which can be obtained by Eq. S12, *i.e.*,

$$\Delta G_f^* = -RT \ln \frac{[\text{X}(\text{DMSO})_n]}{[\text{X}][\text{DMSO}]^n} \quad (\text{S12})$$

in which the square bracket denotes the concentration. Since  $[\text{X}(\text{DMSO})_n] = [\text{X}]$ , Eq. S12 can be rewritten as

$$\Delta G_f^* = nRT \ln[\text{DMSO}] \quad (\text{S13})$$

Bring Eq. S13 into Eq. S11, we have

$$\Delta G^*(X) = \Delta G_f^\circ + \Delta G^*(X(\text{DMSO})_n) - n\Delta G^*(\text{DMSO}) - nRT \ln[\text{DMSO}] - 1.89n \quad (\text{S14})$$

The vaporization Gibbs free energy of DMSO is

$$\Delta G_{\text{vap}}(\text{DMSO}) = -\Delta G^*(\text{DMSO}) - RT \ln[\text{DMSO}] - 1.89 \quad (\text{S15})$$

in which  $\Delta G^*(\text{DMSO}) = -8.76 \text{ kcal mol}^{-1}$  is the self-solvation Gibbs free energy of DMSO, calculated by SMD solvation model,<sup>3</sup> and  $[\text{DMSO}] = 14.09 \text{ mol L}^{-1}$  is the experimental molar concentration of DMSO.<sup>8</sup> Combining Eqs. S14 and S15, we have

$$\Delta G^*(X) = \Delta G_f^\circ + \Delta G^*(X(\text{DMSO})_n) + n\Delta G_{\text{vap}}(\text{DMSO}) \quad (\text{S16})$$

Fig. S3 depicts the optimised  $X(\text{DMSO})_n$  ( $X = \text{Li}^+, \text{Li}_2\text{S}_6, \text{LiS}_6^-, \text{S}_6^{2-}, \text{LiS}_4^+, \text{LiS}_3^+, \text{LiS}_2^+, \text{S}_4^-, \text{S}_3^-, \text{and S}_2^-$ ) clusters in the gas phase, calculated by M06-2X/6-31+G(d) level of theory<sup>9</sup> with D3 dispersion correction.<sup>10</sup> The coordination number of  $\text{Li}^+$  is 4, contributed by the four oxygen atoms from four DMSO molecules, to form  $\text{Li}^+(\text{DMSO})_4$  cluster, which accords with the coordination number reported in a previous study.<sup>11</sup> For the LiPS clusters, since  $\text{Li}^+$  has been coordinated/bonded by two terminal sulfur atoms, we supplemented 4 DMSO molecules to coordinate with  $\text{Li}_2\text{S}_6$  to form  $\text{Li}_2\text{S}_6(\text{DMSO})_4$ , and 2 DMSO molecules to coordinate with  $\text{LiS}_6^-, \text{LiS}_4^+, \text{LiS}_3^+, \text{and LiS}_2^+$ , to form  $\text{LiS}_6^-(\text{DMSO})_2, \text{LiS}_4^+(\text{DMSO})_2, \text{LiS}_3^+(\text{DMSO})_2, \text{and LiS}_2^+(\text{DMSO})_2$ , respectively. Thus, each  $\text{Li}^+$  will retain its 4-coordination number, either with the S-atom in LiPSs or with the O-atom from DMSO. In addition, we also assigned two DMSO molecules to coordinate with anions:  $\text{S}_6^{2-}, \text{S}_4^-, \text{S}_3^-, \text{and S}_2^-$ , to form  $\text{S}_6^{2-}(\text{DMSO})_2, \text{S}_4^-(\text{DMSO})_2, \text{S}_3^-(\text{DMSO})_2, \text{and S}_2^-(\text{DMSO})_2$ , in order to avoid

the electrons of polysulfide (radical) anions being over-polarized by continuum dielectric.<sup>3</sup>

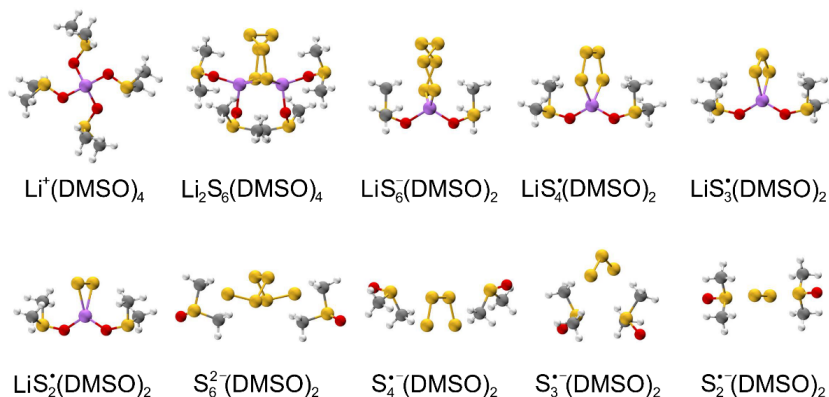

Fig. S3 The optimized X(DMSO)<sub>n</sub> (X = Li<sup>+</sup>, Li<sub>2</sub>S<sub>6</sub>, LiS<sub>6</sub><sup>-</sup>, S<sub>6</sub><sup>2-</sup>, LiS<sub>4</sub><sup>\*</sup>, LiS<sub>3</sub><sup>\*</sup>, LiS<sub>2</sub><sup>\*</sup>, S<sub>4</sub><sup>-</sup>, S<sub>3</sub><sup>-</sup>, and S<sub>2</sub><sup>-</sup>) in the gas phase, the yellow, white, gray, red, and purple balls denote sulfur, hydrogen, carbon, oxygen, and lithium atoms, respectively.

Table S1 lists the  $\Delta G_f^\circ$ ,  $\Delta G^*(X(\text{DMSO})_n)$ ,  $n\Delta G_{\text{vap}}(\text{DMSO})$ , and  $\Delta G^*(X)$  corresponding to Eq. S16. The solvation Gibbs free energy of Li<sup>+</sup>,  $\Delta G^*(\text{Li}^+)$ , is  $-137.3 \text{ kcal} \cdot \text{mol}^{-1}$  in DMSO, which is in accord with that of  $-135.5 \text{ kcal} \cdot \text{mol}^{-1}$  reported by Pliego *et al.*<sup>11</sup> Notably,  $\Delta G^*(\text{S}_6^{2-}) = -154.1 \text{ kcal} \cdot \text{mol}^{-1}$  is the lowest solvation Gibbs free energy among all the polysulfide species studied in this work, suggesting that S<sub>6</sub><sup>2-</sup> is the most stable species in DMSO. The dissociation Gibbs free energy  $\Delta G_{\text{di}}^*$  (i = 1-10), according to Rxns. 1-10, can be calculated via  $\Delta G^*(X)$  in Table S2, with the help of the Eqs. S1-S10 in S2.1.

**Table S1.**  $\Delta G_f^\circ$ ,  $\Delta G^*(X(\text{DMSO})_n)$ ,  $n\Delta G_{\text{vap}}(\text{DMSO})$ , and  $\Delta G^*(X)$  in kcal mol<sup>-1</sup> corresponding to Eq. S16

| X                                     | Li <sup>+</sup> | Li <sub>2</sub> S <sub>6</sub> | LiS <sub>6</sub> <sup>-</sup> | S <sub>6</sub> <sup>2-</sup> | LiS <sub>4</sub> <sup>*</sup> | LiS <sub>3</sub> <sup>*</sup> | LiS <sub>2</sub> <sup>*</sup> | S <sub>4</sub> <sup>-</sup> | S <sub>3</sub> <sup>-</sup> | S <sub>2</sub> <sup>-</sup> |
|---------------------------------------|-----------------|--------------------------------|-------------------------------|------------------------------|-------------------------------|-------------------------------|-------------------------------|-----------------------------|-----------------------------|-----------------------------|
| $\Delta G^*(X(\text{DMSO})_n)$        | -117.0          | -54.8                          | -15.1                         | -24.9                        | -30.9                         | -32.6                         | -33.9                         | -7.4                        | -9.1                        | -14.9                       |
| $\Delta G^*(X(\text{DMSO})_n)$        | -41.5           | -19.6                          | -52.8                         | -139.8                       | -15.5                         | -15.1                         | -16.1                         | -46.1                       | -46.8                       | -46.2                       |
| $n\Delta G_{\text{vap}}(\text{DMSO})$ | 21.2            | 21.2                           | 10.6                          | 10.6                         | 10.6                          | 10.6                          | 10.6                          | 10.6                        | 10.6                        | 10.6                        |
| $\Delta G^*(X)$                       | -137.3          | -53.1                          | -57.3                         | -154.1                       | -35.8                         | -37.1                         | -39.4                         | -42.9                       | -45.3                       | -50.5                       |

**Table S2.** Gibbs free energies (kcal mol<sup>-1</sup>) of Rxns. 1-10 in the gas phase ( $\Delta G_{\text{di}}^\circ$ ) and the DMSO solution phase ( $\Delta G_{\text{di}}^*$ ) and corresponding dissociation constants.

| i                            | 1      | 2      | 3      | 4     | 5      | 6      | 7     | 8     | 9      | 10     |
|------------------------------|--------|--------|--------|-------|--------|--------|-------|-------|--------|--------|
| $\Delta G_{\text{di}}^\circ$ | 129.90 | 227.75 | -59.05 | 32.47 | 136.23 | -42.93 | 26.15 | 37.65 | 135.76 | 171.30 |
| $\Delta G_{\text{di}}^*$     | -9.71  | -4.46  | 6.34   | 9.26  | -7.38  | 19.66  | 6.94  | 17.44 | -6.75  | -5.21  |
| $pK_{\text{di}}$             | -7.11  | -3.27  | 4.65   | 6.79  | -5.41  | 14.41  | 5.09  | 12.78 | -4.94  | -3.82  |

### S2.3 Dissociation constant $pK_{\text{di}}$ (i = 1-10)

The dissociation constant  $pK_{\text{di}}$  (i = 1-10) can be calculated by the following Eq. S17.

$$pK_{di} = \frac{\Delta G_{di}^*}{2.303RT} \quad (S17)$$

in which  $R = 0.001987 \text{ kcal mol}^{-1} \text{ K}^{-1}$  is the ideal gas constant, and temperature  $T = 298.15 \text{ K}$ . The corresponding  $pK_{di}$  are listed in Table S2.

### S3 UV-vis spectrum of pure DMSO

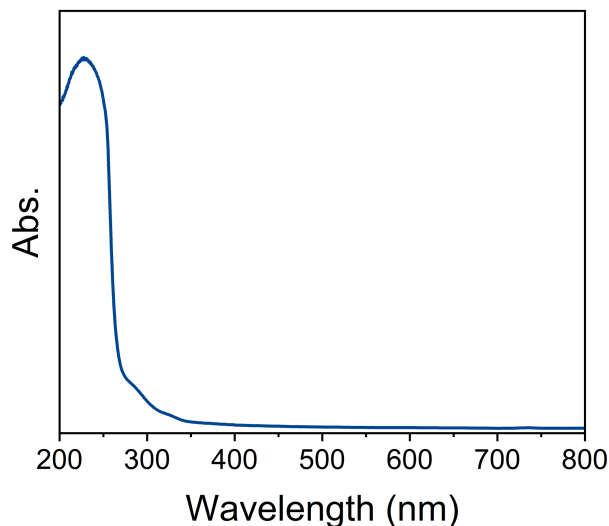

Fig. S4 UV-vis spectrum of DMSO without  $\text{Li}_2\text{S}_6$ .

### S4 Calculated UV-vis spectra and natural transition orbital (NTO) pairs of $\text{S}_6^{2-}$ and $\text{S}_3^{\bullet-}$

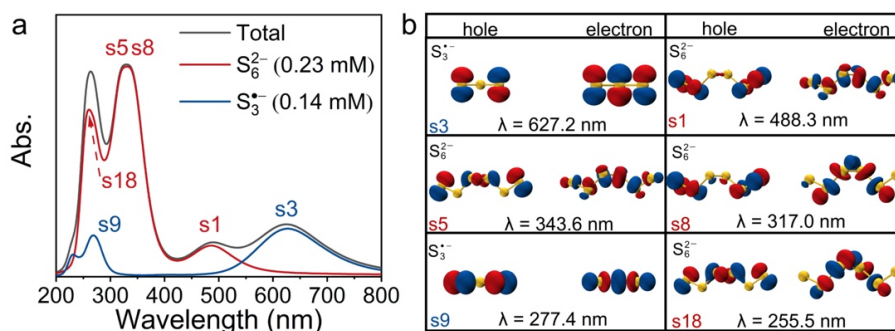

Fig. S5 (a) The calculated UV-vis spectra by TD-DFT<sup>4</sup> calculation at SMD/M06-2X/6-311+G(2d,p) level of theory. The red and blue curves represent the individual adsorption of  $\text{S}_6^{2-}$  and  $\text{S}_3^{\bullet-}$ , respectively, according to the calculated concentration of  $\text{S}_6^{2-}$  and  $\text{S}_3^{\bullet-}$  using  $pK_{d3}$  in Table S2. The black curve represents the total adsorption weighted by the contributions of  $\text{S}_6^{2-}$  and  $\text{S}_3^{\bullet-}$ . (b) The NTO pairs of  $\text{S}_6^{2-}$  and  $\text{S}_3^{\bullet-}$  which resulted in the four absorption bands seen in (a). The excitation state of each NTO pair is shown in the left corner.

The calculated UV-vis spectrum of  $\text{S}_6^{2-}$  and  $\text{S}_3^{\bullet-}$ , obtained from their calculated concentrations of 0.23 mM and 0.14 mM from  $pK_{d3}$  in Table S2, are shown in Fig. S3a. It can be seen that the calculated spectrum is consistent with the experiment in terms of peak positions. Specifically, the experimental absorption bands at 355 and 491 nm (vs.

332.4 and 488.3 nm by calculation) are attributed to  $S_6^{2-}$ . The absorption band at 617 nm (vs. 627.2 nm by calculation) is attributed to  $S_3^{\bullet-}$ . The absorption band at 267 nm (vs. 261.4 nm by calculation) is attributed to the contribution of both  $S_6^{2-}$  and  $S_3^{\bullet-}$ . Fig. S3b illustrates the excitation model of the four absorption bands at 267, 355, 491, and 617 nm, represented by natural transition orbitals (NTOs)<sup>12</sup>. The two absorption bands in the visible light region (491 and 617 nm) are attributed to the s1 excitation state of  $S_6^{2-}$  ( $n \rightarrow \sigma^*$  excitation) and the s3 excitation state of  $S_3^{\bullet-}$  ( $n \rightarrow \pi^*$  excitation), respectively. In the ultraviolet region, the absorption band at 355 nm is attributed to the two NTO pairs of  $S_6^{2-}$ , s5 and s8 ( $n \rightarrow \sigma^*$  excitation). Both the s9 excitation state of  $S_3^{\bullet-}$  and the s18 excitation state of  $S_6^{2-}$  contribute to the absorption band at 267 nm with  $n \rightarrow \sigma^*$  excitation.

### S5 Calculated UV-vis spectrum of $S_2^{\bullet-}$

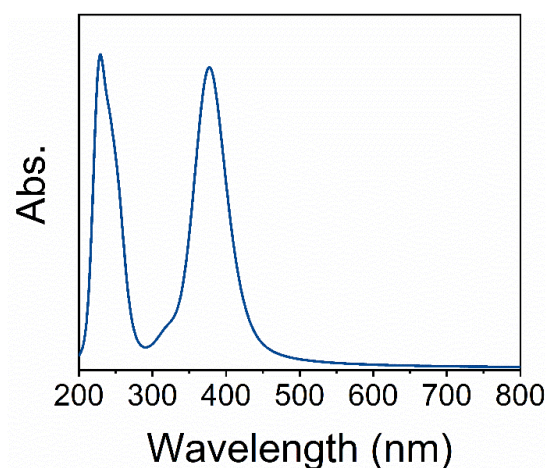

**Fig. S6.** Calculated UV-Vis spectrum of  $S_2^{\bullet-}$ , performed by the TD-DFT method<sup>4</sup> at M06-2X/6-311+G(2d,p) level of theory with the SMD solvation mode.

### S6 The color of DMSO solution with different $Li_2S_6$ concentrations

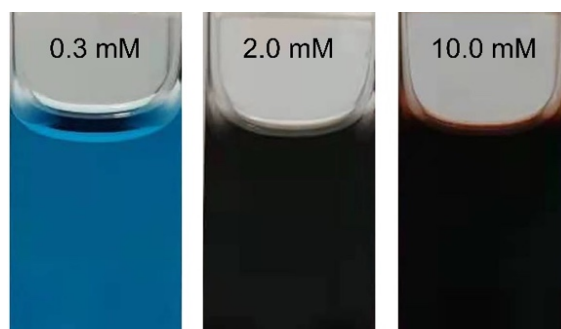

**Fig. S7.** The visible color change of DMSO solutions when  $Li_2S_6$  was added at different concentrations. The solution was blue when  $S_3^{\bullet-}$  was at a low concentration (0.3 mM), and it changed to red color with a higher concentration of  $S_6^{2-}$  (10.0 mM). The color changes imply that the entropy-driven dissociation reaction of  $S_6^{2-}$  into  $S_3^{\bullet-}$  is also affected by the concentration of  $Li_2S_6$ .



### S7 The UV-vis and ESR spectra of $\text{Li}_2\text{S}_6$ in Tetramethylurea solvent.

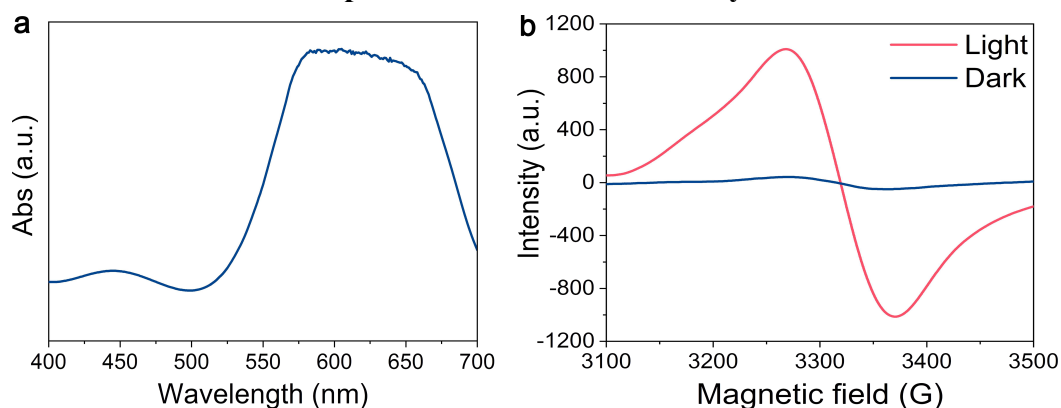

**Fig. S8.** Experimental test for highly solvating tetramethylurea solution of  $\text{Li}_2\text{S}_6$ . (a) UV-vis spectrum; (b) ESR spectra under light and dark

### S8 The cyclic performance of Li-S batteries with and without pre-introducing $\text{S}_3^{\bullet-}$

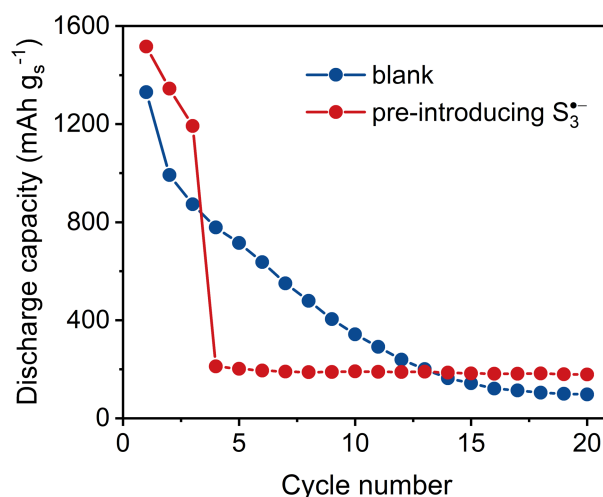

**Fig. S9.** The cycling performance of Li-S batteries with (blank) and without pre-introducing  $\text{S}_3^{\bullet-}$ .

Fig. S9 shows that the Li-S battery with pre-introducing  $\text{S}_3^{\bullet-}$  has a higher discharge capacity, compared with the blank one during the first 3 cycles, suggesting that  $\text{S}_3^{\bullet-}$  can enhance sulfur utilization in the electrochemical reactions. However, the higher sulfur utilization also leads to more dissolution of polysulfides. So, the Li-S battery with pre-introducing  $\text{S}_3^{\bullet-}$  shows a quickly capacity decay, resulting from the more severe shuttle.

### S9 SEM images of anode retrieved from the blank cells and the cells of adding 5 mM $\text{Li}_2\text{S}_6$

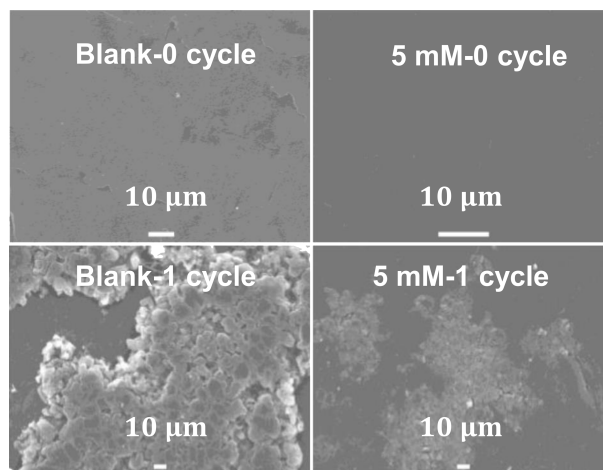

**Fig. S10.** SEM images of anode retrieved from the blank cells and the cells of adding 5 mM  $\text{Li}_2\text{S}_6$ .

## References

1. Y. Zhao and D. G. Truhlar, *J. Chem. Phys.*, 2006, **125**, 194101.
2. J. R. Pliego and J. M. Riveros, *J. Phys. Chem. A*, 2001, **105**, 7241-7247.
3. A. V. Marenich, C. J. Cramer and D. G. Truhlar, *J. Phys. Chem. B*, 2009, **113**, 6378-6396.
4. X. Li, N. Govind, C. Isborn, A. E. DePrince and K. Lopata, *Chem. Rev.*, 2020, **120**, 9951-9993.
5. M. Isegawa, R. Peverati and D. G. Truhlar, *J. Chem. Phys.*, 2012, **137**, 244104.
6. L. R. Domingo, E. Chamorro and P. Pérez, *J. Org. Chem.*, 2008, **73**, 4615-4624.
7. M. J. Frisch, G. W. Trucks, H. B. Schlegel, G. E. Scuseria, M. A. Robb, J. R. Cheeseman, G. Scalmani, V. Barone, G. A. Petersson, H. Nakatsuji, X. Li, M. Caricato, A. V. Marenich, J. Bloino, B. G. Janesko, R. Gomperts, B. Mennucci, H. P. Hratchian, J. V. Ortiz, A. F. Izmaylov, J. L. Sonnenberg, Williams, F. Ding, F. Lipparini, F. Egidi, J. Goings, B. Peng, A. Petrone, T. Henderson, D. Ranasinghe, V. G. Zakrzewski, J. Gao, N. Rega, G. Zheng, W. Liang, M. Hada, M. Ehara, K. Toyota, R. Fukuda, J. Hasegawa, M. Ishida, T. Nakajima, Y. Honda, O. Kitao, H. Nakai, T. Vreven, K. Throssell, J. A. Montgomery Jr., J. E. Peralta, F. Ogliaro, M. J. Bearpark, J. J. Heyd, E. N. Brothers, K. N. Kudin, V. N. Staroverov, T. A. Keith, R. Kobayashi, J. Normand, K. Raghavachari, A. P. Rendell, J. C. Burant, S. S. Iyengar, J. Tomasi, M. Cossi, J. M. Millam, M. Klene, C. Adamo, R. Cammi, J. W. Ochterski, R. L. Martin, K. Morokuma, O. Farkas, J. B. Foresman and D. J. Fox, *Gaussian 16, Revision B.01*, Gaussian, Inc., Wallingford CT, 2016.
8. W. M. Haynes, *CRC handbook of chemistry and physics*, CRC press, 2014.
9. Y. Zhao and D. G. Truhlar, *Theor. Chem. Acc.*, 2008, **120**, 215-241.
10. S. Grimme, J. Antony, S. Ehrlich and H. Krieg, *J. Chem. Phys.*, 2010, **132**, 154104.
11. E. Westphal and J. R. Pliego, *J. Chem. Phys.*, 2005, **123**, 074508.
12. R. L. Martin, *J. Chem. Phys.*, 2003, **118**, 4775-4777.
